# Supplementary material
Source: PubMed Central journal article supplement (PMC6800319)
Supplement: pnas.1907595116.sapp.pdf [file pnas.1907595116.sapp.pdf]

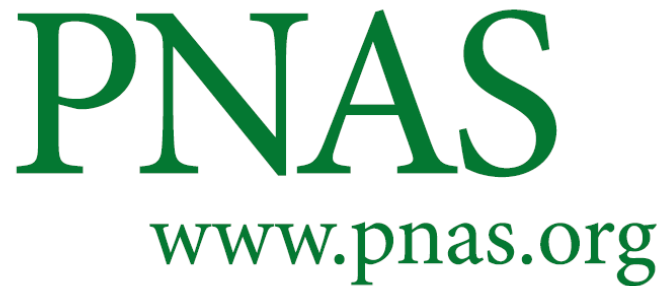

## Supplementary Information for

### ROR $\alpha$ Is Crucial for Attenuated Inflammatory Response to Maintain Intestinal Homeostasis

Se Kyu Oh<sup>a,1</sup>, Dongha Kim<sup>a,1</sup>, Kyeongkyu Kim<sup>a</sup>, Kyungjin Boo<sup>a</sup>, Young Suk Yu<sup>a</sup>, Ik Soo Kim<sup>a</sup>, Yoon Jeon<sup>b</sup>, Ho Lee<sup>b</sup>, Sun-Kyoung Im<sup>c</sup>, Su-Hyung Lee<sup>d</sup>, Ji Min Lee<sup>e</sup>, Younhee Ko<sup>f</sup>, Daechan Park<sup>g,\*</sup>, Sungsoon Fang<sup>c,\*</sup>, and Sung Hee Baek<sup>a,\*</sup>

\*Corresponding author.

Email: sbaek@snu.ac.kr, sfang@yuhs.ac, or dpark@ajou.ac.kr

#### **This PDF file includes:**

Supplementary Figures and Figure Legends

Figs. S1 to S10

## Supplementary Figures and Figure Legends

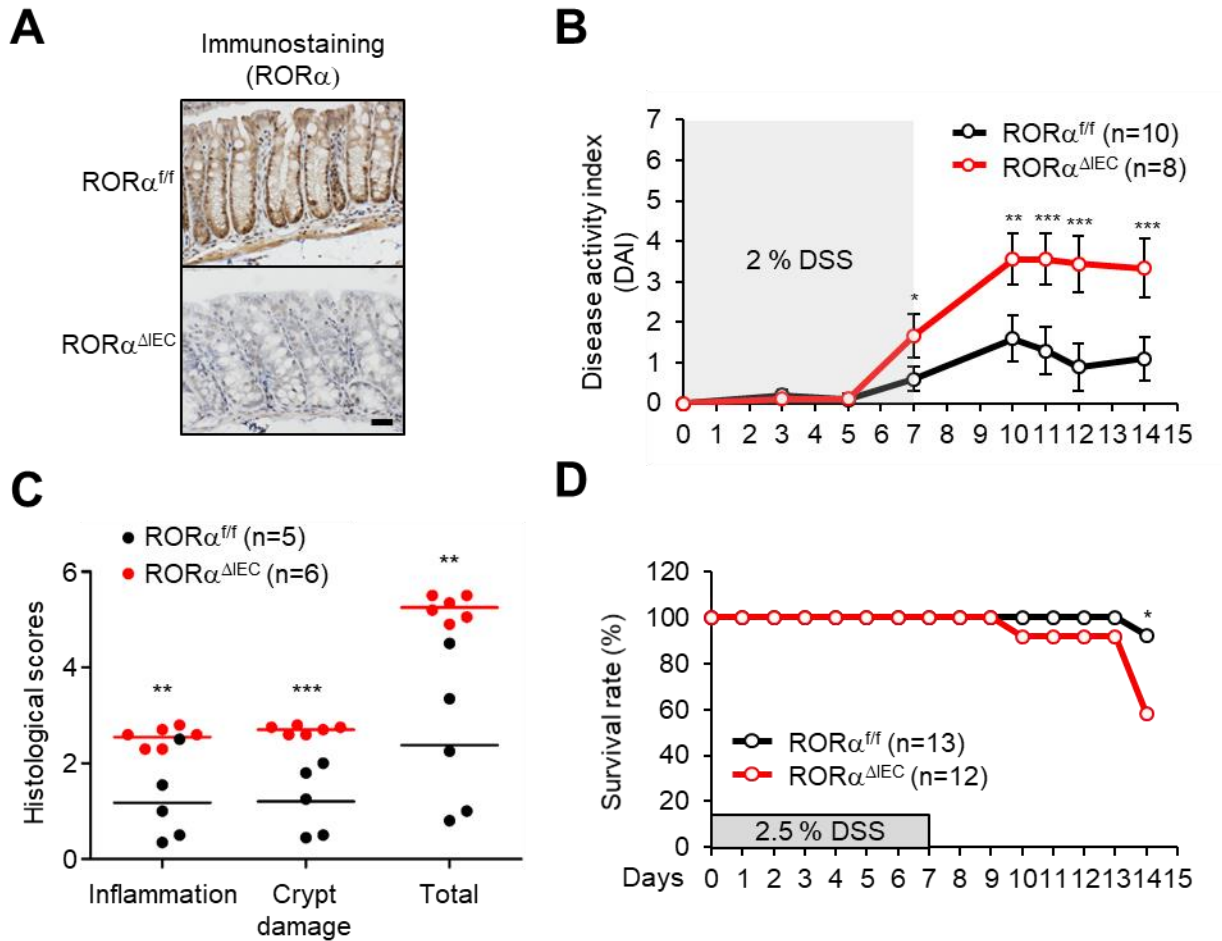

**Fig. S1.** Colitis severity in ROR $\alpha^{\Delta IEC}$  mice with DSS treatment. **(A)** Immunohistochemistry of colon sections from ROR $\alpha^{ff}$  and ROR $\alpha^{\Delta IEC}$  mice using an anti-ROR $\alpha$  antibody. Scale bar, 50  $\mu$ m. **(B)** Disease activity index (DAI) scores of ROR $\alpha^{ff}$  and ROR $\alpha^{\Delta IEC}$  mice during described period. (n = 8~10 per group) **(C)** Histological scores of colon sections from ROR $\alpha^{ff}$  and ROR $\alpha^{\Delta IEC}$  mice after 8 days of 2 % DSS treatment. (n = 5~6 per group) **(D)** The survival curves of DSS-treated ROR $\alpha^{ff}$  and ROR $\alpha^{\Delta IEC}$  mice. ROR $\alpha^{ff}$  and ROR $\alpha^{\Delta IEC}$  mice were given 2.5 % DSS in their drinking water for 7 days, then given regular drinking water for an additional 7 days. Viability was monitored daily. Difference in survival was determined with Kaplan-Meier analysis. (n = 12~13 per group); \* $P < 0.05$ , \*\* $P < 0.01$ , \*\*\* $P < 0.001$ . Statistical analysis was performed using unpaired  $t$ -test. **(B and C; mean  $\pm$  SEM)** Data are from three independent experiments.

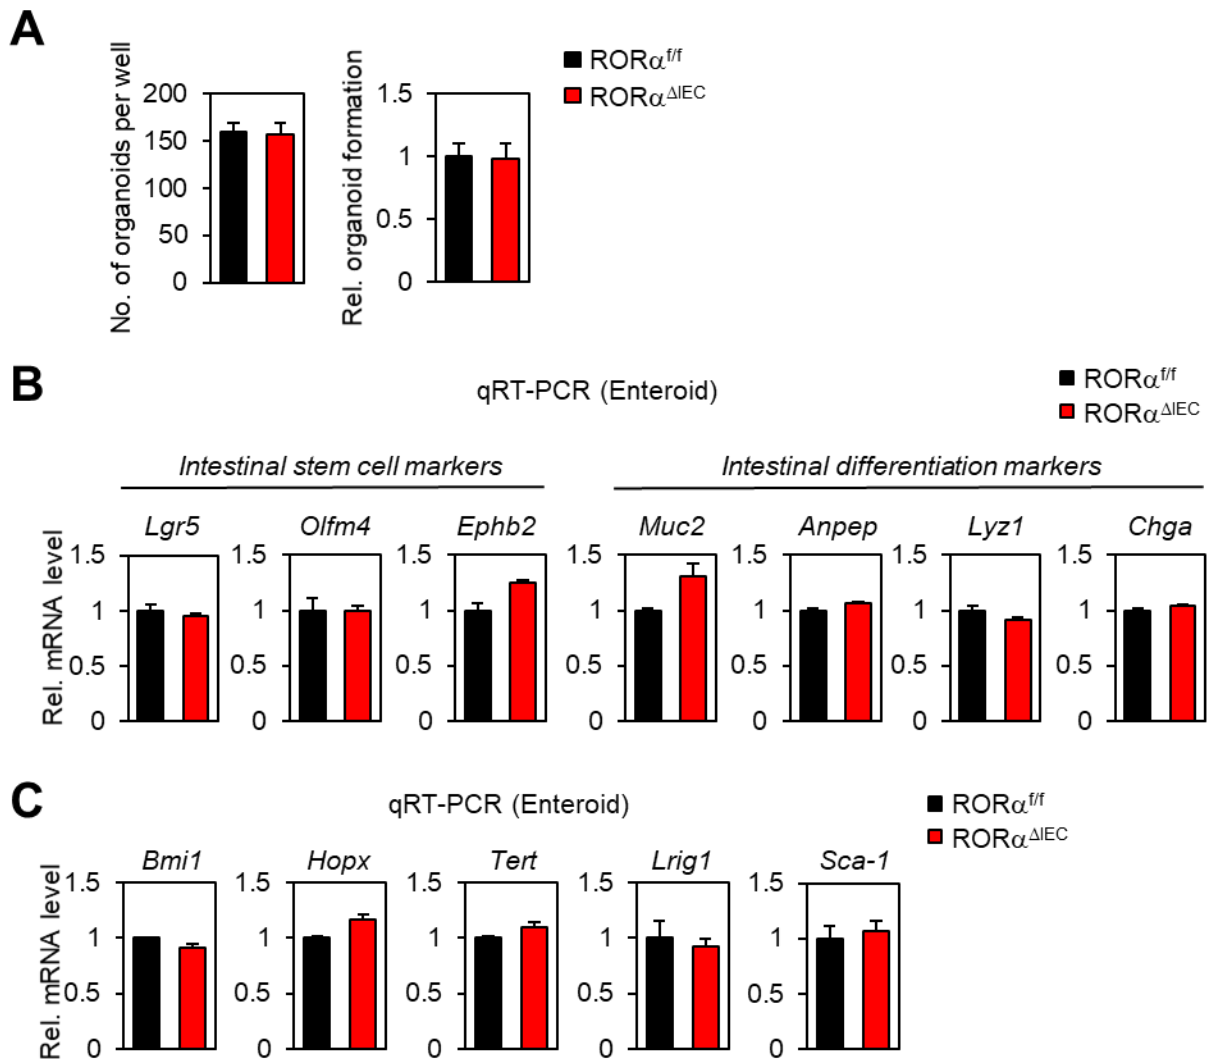

**Fig. S2.** Regenerative capacity of ROR $\alpha$  KO organoids is normal compared with those of WT organoids. **(A)** Intestinal organoid formation efficiency from ROR $\alpha^{f/f}$  and ROR $\alpha^{\Delta IEC}$  mice. 1000-crypts were seeded, and live organoids were counted using microscopy at day 4 of culture. **(B)** mRNA levels of intestinal stem cell markers and differentiation markers in colon organoids from ROR $\alpha^{f/f}$  and ROR $\alpha^{\Delta IEC}$  mice. **(C)** mRNA levels reserve stem cell markers in colon organoids from ROR $\alpha^{f/f}$  and ROR $\alpha^{\Delta IEC}$  mice. Statistical analysis was performed using unpaired *t*-test. **(A, B and C;** mean  $\pm$  SEM) Data are from three independent experiments.

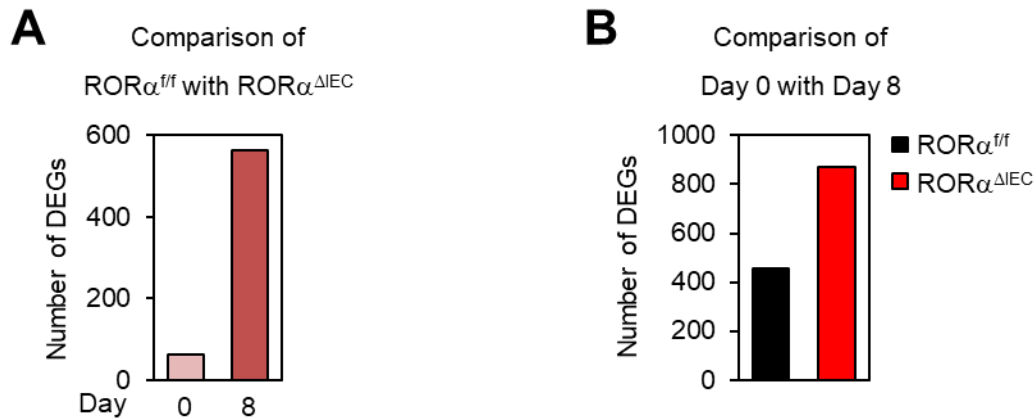

**Fig. S3.** The number of DEGs from RNA-sequencing analysis of ROR $\alpha^{f/f}$  and ROR $\alpha^{\Delta IEC}$  IECs. DEGs are identified by either comparing the gene expression between two genotypes or days of DSS treatment. (Adjusted p-value  $\leq 0.05$  and  $|\log_2FC| \geq 1$ ) **(A)** The number of DEGs generated by comparing ROR $\alpha^{f/f}$  IECs with ROR $\alpha^{\Delta IEC}$  IECs on Day 0 and Day 8, respectively. **(B)** The number of DEGs generated by comparing gene expression on Day 0 with that on Day 8 in each genotype, respectively.

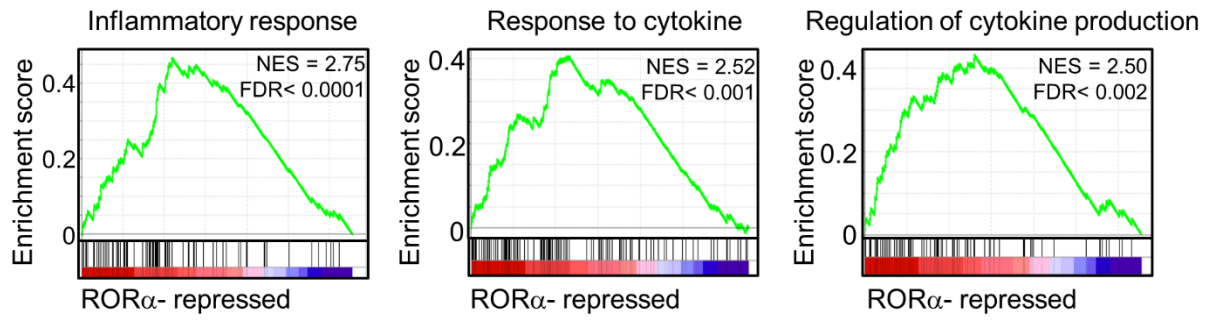

**Fig. S4.** Representative gene set enrichment analysis (GSEA) results. The gene sets involved in inflammatory response, response to cytokine and regulation of cytokine production are significantly enriched according to the phenotypic labels.

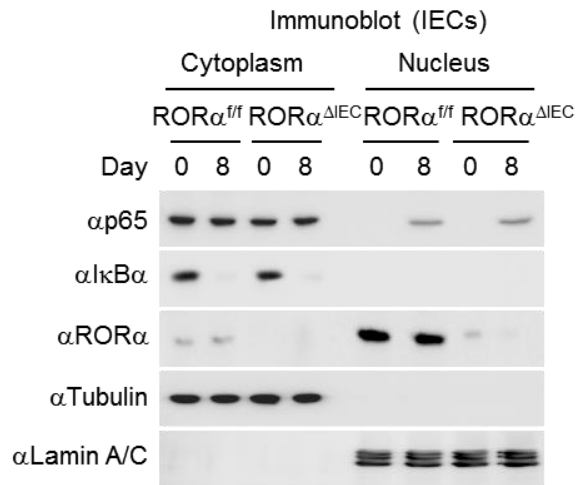

**Fig. S5.** Immunoblot analysis of IECs from ROR $\alpha^{f/f}$  and ROR $\alpha^{\Delta IEC}$  mice with the indicated antibodies after 8 days (DSS 5 days + water 3 days) of 2 % DSS (n = 6 per group). Tubulin was used as a loading control for cytoplasmic proteins and Lamin A/C was used for nuclear proteins.

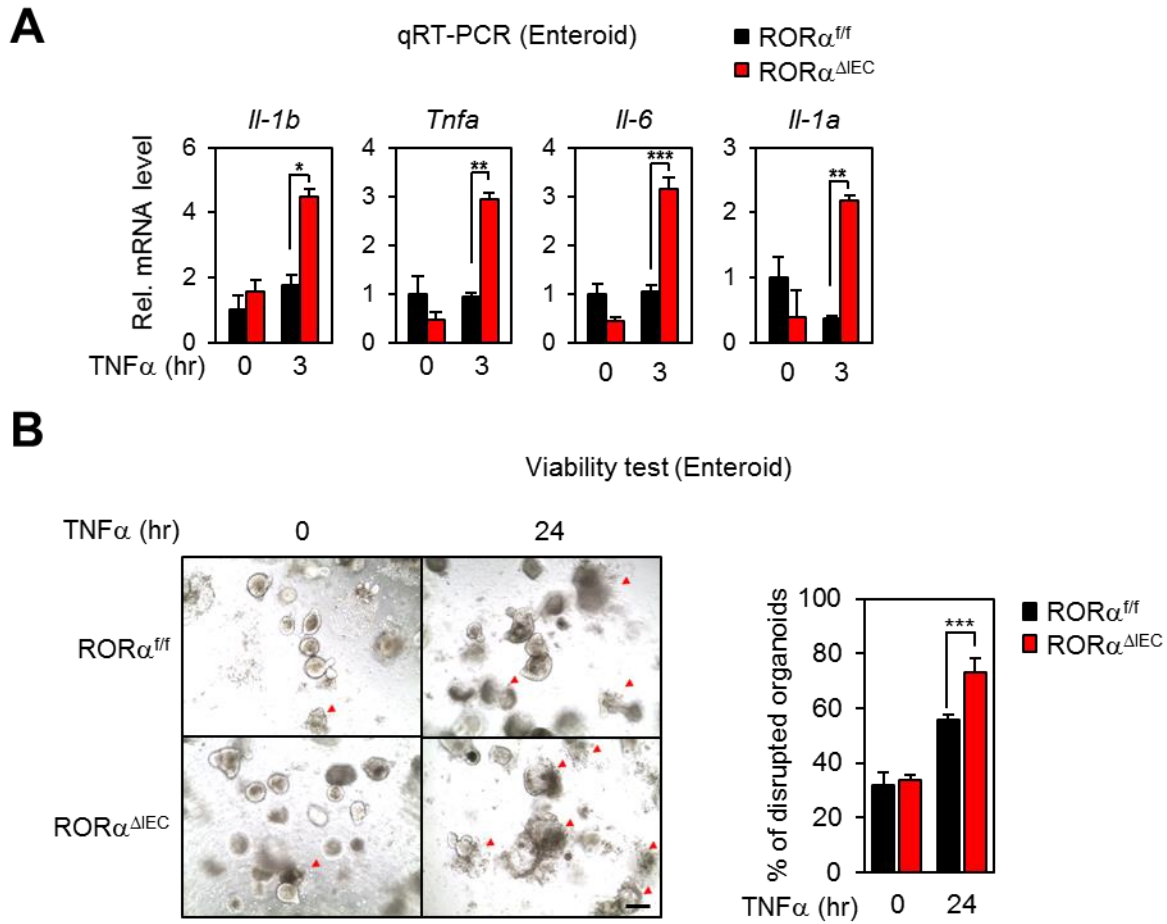

**Fig. S6.**  $ROR\alpha$  KO organoids are highly susceptible to  $TNF\alpha$  treatment. **(A)** Relative mRNA level measured in colon organoids from  $ROR\alpha^{f/f}$  and  $ROR\alpha^{\Delta IEC}$  mice. Colon organoids were treated with  $TNF\alpha$  (100ng/ml) for 3 hrs. **(B)** Representative microscopic images showing colon organoids treated with  $TNF\alpha$  (100ng/ml) for 24 hrs. The number of live and disrupted organoids was counted after the treatment. (n = 2 per groups). \* $P < 0.05$ , \*\* $P < 0.01$ , \*\*\* $P < 0.001$ . Statistical analysis was performed using unpaired  $t$ -test. **(A and B;** mean  $\pm$  SEM) Data are from three independent experiments.

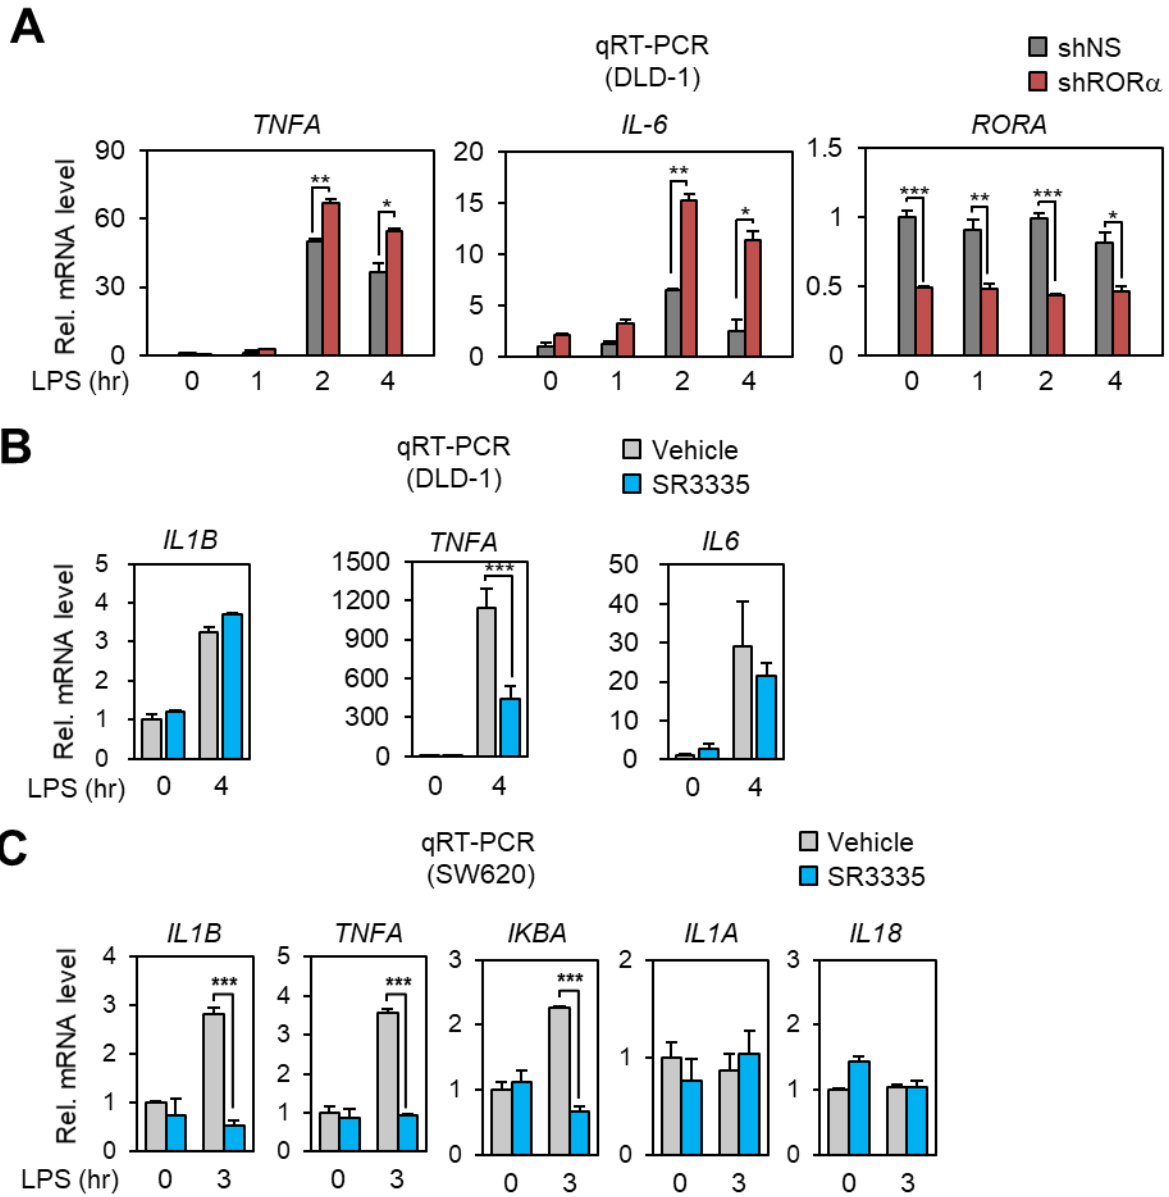

**Fig. S7.** ROR $\alpha$  suppresses transcription of NF- $\kappa$ B target genes in colorectal cancer cell lines after LPS treatment. (A) qRT-PCR analysis of inflammatory genes in DLD-1 cells after LPS (1  $\mu$ g/ml) treatment for the indicated times. (B and C) Colorectal cancer cell lines including DLD-1 and SW620 were treated with LPS (1  $\mu$ g/ml) for the indicated times. Either SR3335 (5  $\mu$ M) or DMSO was treated with LPS at the same points. \* $P$ <0.05, \*\* $P$ <0.01, \*\*\* $P$ <0.001. Statistical analysis was performed using unpaired  $t$ -test. (A, B and C; mean  $\pm$  SEM) Data are from three independent experiments.



### Cumulative comparison of 4 DEG sets with HDAC3<sup>ΔIEC</sup> DEGs

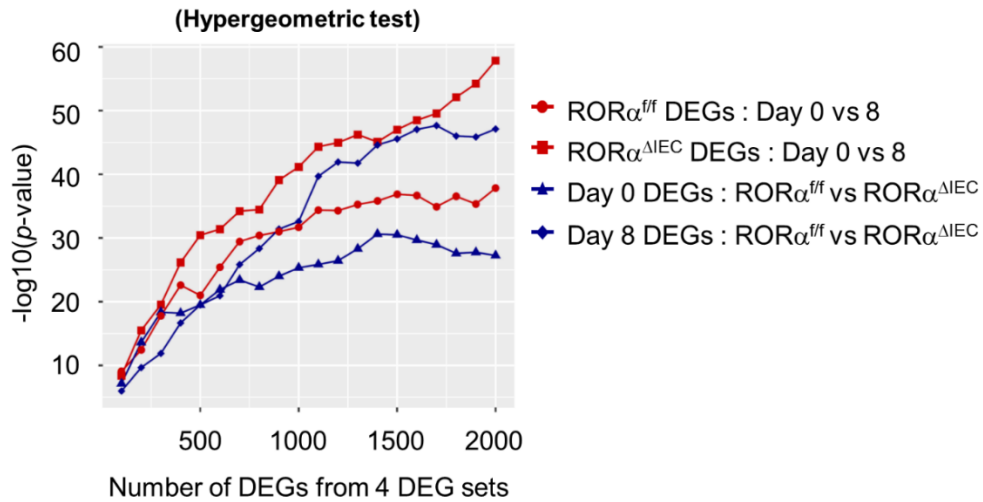

**Fig. S8.** ROR $\alpha$  and HDAC3 share common target genes under DSS-induced injury. “ROR $\alpha^{f/f}$  DEGs” represents the DEGs identified in IECs from ROR $\alpha^{f/f}$  mice by comparing day 0 with day 8 after DSS treatment. Cumulative comparison of 4 DEG sets (ROR $\alpha^{f/f}$  DEGs, ROR $\alpha^{\Delta IEC}$  DEGs, Day 0 DEGs, and Day 8 DEGs) with the HDAC3<sup>ΔIEC</sup> DEGs. “HDAC3<sup>ΔIEC</sup> DEGs” are identified by comparing the gene expression profiles between HDAC3<sup>f/f</sup> IECs and HDAC3<sup>ΔIEC</sup> IECs. The 4 DEG sets are constructed by comparing gene expression of every possible combination of factors including day of treatment and genotype. Thus, each line indicates overlaps of a DEG set with HDAC3<sup>ΔIEC</sup> DEGs. Hypergeometric test shows that ROR $\alpha$  deletion along with DSS-injury has the highest degree of overlaps with HDAC3<sup>ΔIEC</sup> DEGs.

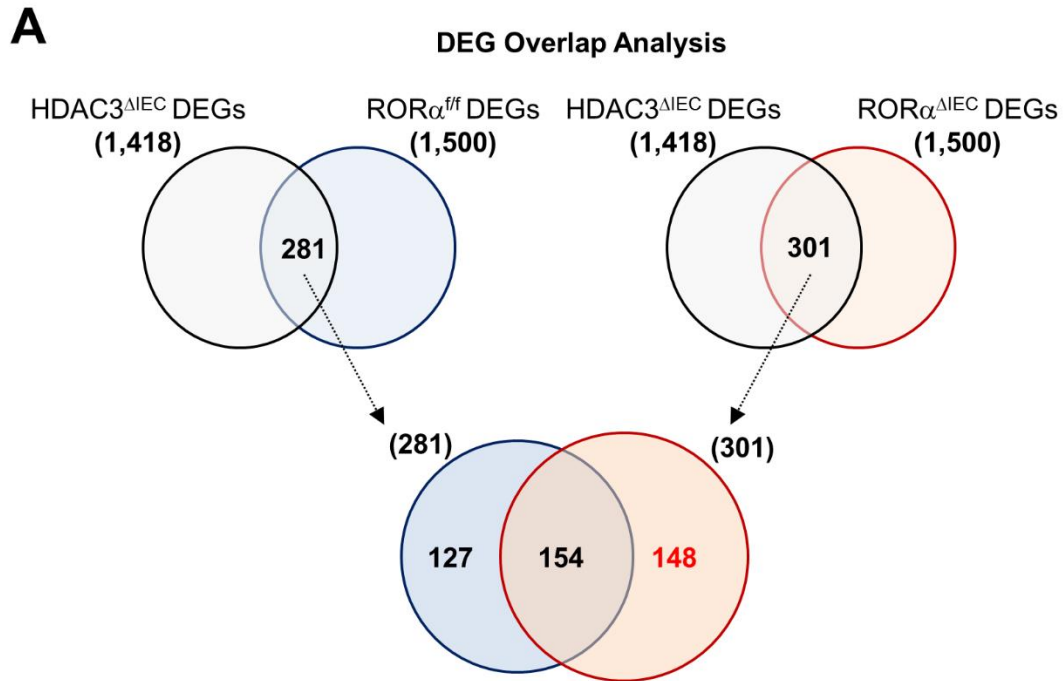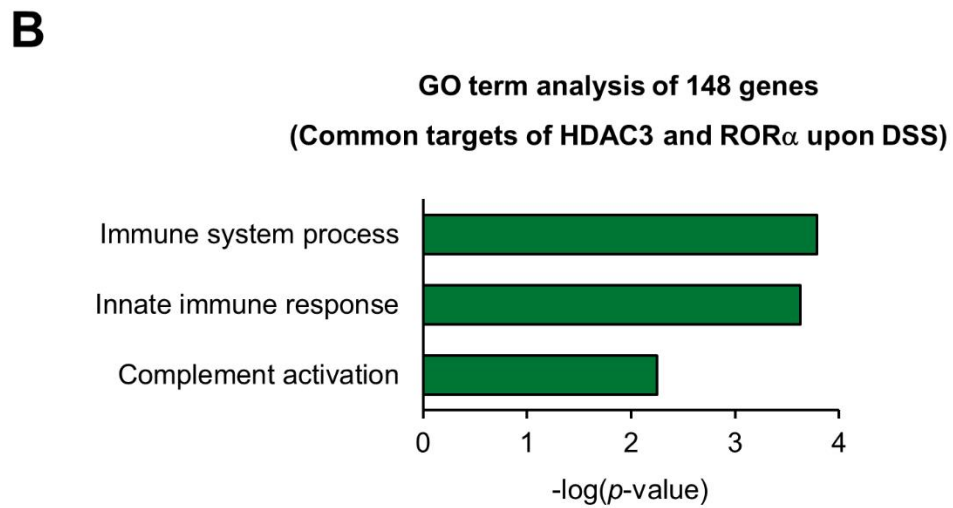

**Fig. S9.** ROR $\alpha$  and HDAC3 share common inflammatory target genes under DSS-induced injury. (A) Three different comparison of DEGs shown as Venn diagram. (B) GO term analysis for the shared targets of HDAC3 and ROR $\alpha$  upon DSS treatment (n= 148).

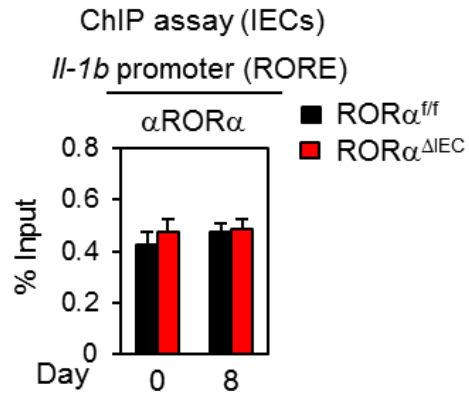

**Fig. S10.** ChIP assays were performed on the *Il-1b* promoter (ROR-response element) in IECs from ROR $\alpha^{f/f}$  and ROR $\alpha^{\Delta IEC}$  mice after 8 days of 2 % DSS (n = 5 per group). Promoter occupancy by ROR $\alpha$  was analyzed. Statistical analysis was performed using unpaired *t*-test. (mean  $\pm$  SEM) Data are from three independent experiments.
